# Supplementary figures and images for: Preparation, characterization and antifouling properties of polyacrylonitrile/polyurethane blend membranes for water purification
Source: Royal Society of Chemistry journal article supplement (doi:10.1039/c5ra00736d), 2015-01-01

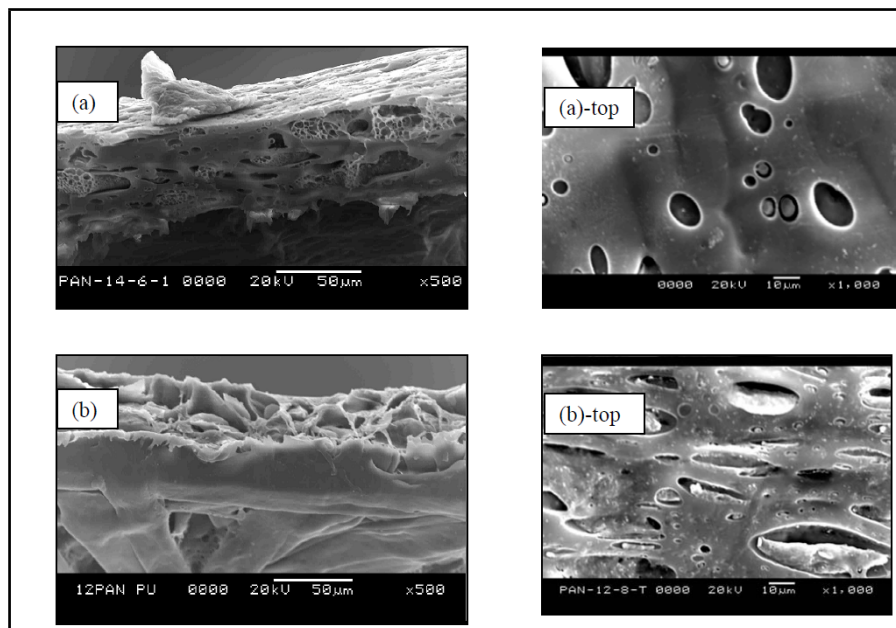

**Fig. S1** Cross sectional and top view SEM images of PAN/PU blend membrane of blend ratio (a) 70/30 (b) 60/40.

Supplement: c5ra00736d1.pdf [file c5ra00736d1.pdf]
